# Supplementary material for: Seave: a comprehensive web platform for storing and interrogating human genomic variation
Source: PubMed Central journal article supplement — Bioinformatics. 2018 Jul 2;35(1):122–5. doi: 10.1093/bioinformatics/bty540 (PMC6298057; doi:10.1093/bioinformatics/bty540), 2018-07-02
Supplement: bty540_supp_figs.pdf [file bty540_supp_figs.pdf]

## Supplementary Data

### Variant Annotation

There are a number of stages in which variants are annotated. VEP (McLaren *et al.*, 2016) and GEMINI (Paila *et al.*, 2013) annotate variants with gene, transcript and impact severity, as well as allele frequencies from dbSNP, ExAC (Lek *et al.*, 2016), 1000 Genomes (1000 Genomes Project Consortium *et al.*, 2015), and EVS (Tennessen *et al.*, 2012), as well as *in silico* predictions from PolyPhen-2 (Adzhubei *et al.*, 2010), SIFT (Kumar *et al.*, 2009) and CADD (Kircher *et al.*, 2014). Additional SNV and Indel annotations are managed by Seave; variant allele frequencies in healthy controls: MGRB [<https://sgc.garvan.org.au/initiatives/mgrb>] (Lacaze *et al.*, 2018; McNeil *et al.*, 2017; 45 and Up Study Collaborators *et al.*, 2008); diseases: ClinVar (Landrum *et al.*, 2013), MITOMAP (Ruiz-Pesini *et al.*, 2007), COSMIC (Forbes *et al.*, 2010, 2015); links to phenotypes and disorders: OMIM (Amberger *et al.*, 2015), COSMIC Cancer Gene Census (CGC) (Futreal *et al.*, 2004), Orphanet [<http://www.orpha.net>] (Orphanet, 2017), and Genomics England PanelApp [<https://panelapp.genomicsengland.co.uk>]; and pre-computed *in silico* annotations from RVIS (Petrovski *et al.*, 2013), and dbNSFP (Liu *et al.*, 2013), which provides PROVEAN (Choi *et al.*, 2012), FATHMM (Shihab *et al.*, 2014), MetaSVM/MetaLR (Dong *et al.*, 2015), and GERP++ (Davydov *et al.*, 2010). To keep these annotations up-to-date, we provide tools for downloading and updating many of these resources.

# Supplementary Figures

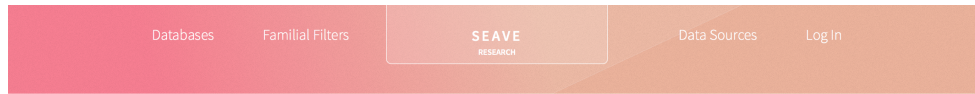

Pull up a chair and **grab some data**.

*First, you need to select some data in a database. Click the database row you would like to query. Databases with pedigree information can utilise advanced queries and it is recommended you add this information to your databases.*

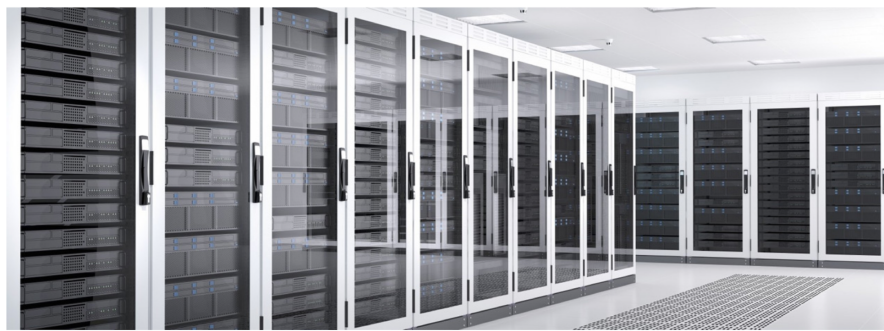

## Available databases

Show 25 entries

| Database                             | Group  | Sample Names            | Samples | Variants | Size      | Date       | GEMINI  | Actions |
|--------------------------------------|--------|-------------------------|---------|----------|-----------|------------|---------|---------|
| AshkenaziTrio.Oslo.hc.joint.vqsr.vcp | Public | HG002;HG003;HG004       | 3       | 98303    | 685.28 MB | 04/12/2015 | v0.11.0 |         |
| NA12878trio.hc.vqsr.decomposed.nc    | Public | NA12878;NA12891;NA12893 | 3       | 6474526  | 19.35 GB  | 14/07/2017 | v0.18.3 |         |

Showing 1 to 2 of 2 entries Previous 1 Next

Seave is running GEMINI version 0.19.1.

To see private databases, you need to log in.

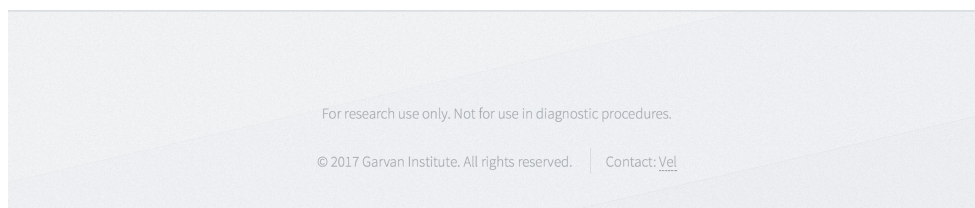

Figure S1: Seave screenshot: database selection page. This page shows the available databases for query and information about them, including the number of samples and variants. Upon logging in, this page displays databases from all groups the user has access to.

Databases
Familial Filters
SEAVE
Data Sources
Log In

Your database contains **families**.

You can choose to use familial information to conduct variant filtration on members of a single family using predefined analysis methods. Alternatively, you can choose to analyse the entire dataset.



**Database selected**  
NA128789.hc.vqsr.decomposed.normalised.vep.db

Select a family to analyse

**Family information**  
NA12878 (Female) - Affected  
NA12891 (Male) - Unaffected  
NA12892 (Female) - Unaffected  
*Please ensure this information is correct before proceeding.*

Select an analysis type

None   Homozygous/Recessive   Heterozygous Dominant   Compound Heterozygous

**Familial filtering**

Click each of the headings below if you would like more information regarding the filtration mechanism and for different example familial scenarios.

---

**Heterozygous dominant**



All affected individuals have a heterozygous genotype and all unaffected individuals do not have a heterozygous genotype. Equivalent to autosomal dominant in the autosome and X-linked dominant in the X chromosome.

---

**Homozygous/hemizygous recessive**



All affected individuals have a homozygous alternate genotype and all unaffected individuals do not have a homozygous alternate genotype. Equivalent to autosomal recessive in the autosome and X-linked recessive in the X chromosome.

---

**Compound heterozygous**



Affected individuals all share a heterozygous genotype and for one position in a gene one unaffected individual shares this heterozygous genotype with the affecteds and in another position another unaffected individual shares the heterozygous genotype with the converse not being true.

---

**De novo dominant**



All affected individuals share a heterozygous variant and all unaffected individuals either share a homozygous reference or homozygous alternate genotype.

---

**None**

The none analysis type returns all variants in the database where at least one of the samples in the family selected has a variant.

For research use only. Not for use in diagnostic procedures.  
© 2017 Garvan Institute. All rights reserved. [Contact Us](#)

Figure S2: Seave screenshot: family and analysis selection page. After clicking a database to query, this page optionally allows selecting a family within it to query. If a family is selected, further options to select an analysis type (i.e. inheritance pattern) appear.

[Databases](#)
[Familial Filters](#)
**SEAVE**
[Data Sources](#)
[Log In](#)

OK, you have some data. Now filter it.

Select from the filtration options below.

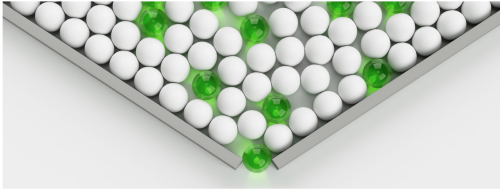

**Database selected**  
NA128781to\_hc.vqsr.decomposed.normalised.vep.vcf

**Family selected**  
NA128781to

**Inclusion genomic location(s)**  
Search region(s)  
e.g. chr2:15483-25583;chr1:37211-67824;chr5:MT  
Separate multiple regions to search with a semicolon. To search all regions, leave this box blank. Any genes specified will be restricted to these coordinates.

Search gene list(s)  
ACMG 56 genes (56)  
ACMG cancer genes (AD only) (22)  
ACMG cancer genes (AR + AD) (28)  
ACMG cancer genes (AR only) (1)  
Arrhythmic\_Syndromes\_Aug\_2015\_Fatkin (4)  
Clear

Search custom gene list  
e.g. BRCA1,PIK3CA,TP53  
Separate multiple genes with a semicolon, comma or space. To search all genes, leave this box blank.

**Impact**  
Restrict variants by impact  
 Loss of Function
  High Impact
  High & Moderate Impact  
 Coding
  All Impact

Minimum scaled CADD score  
  
All variants without CADD scores are returned. For no minimum scaled CADD score, set this value to 0.

**Quality**  
Minimum sequencing depth in all samples selected  
  
For no minimum sequencing depth, set this value to 0.  
 Minimum variant quality  
  
For no minimum variant quality, set this value to 0.

Exclude failed variants

**Exclusion genomic location(s)**  
Exclude region(s)  
e.g. chr2:15483-25583;chr1:37211-67824;chr5:MT  
Separate multiple regions to exclude with a semicolon. To search all regions, leave this box blank. Any genes specified will be restricted to these coordinates.

Exclude gene list(s)  
ACMG 56 genes (56)  
ACMG cancer genes (AD only) (22)  
ACMG cancer genes (AR + AD) (28)  
ACMG cancer genes (AR only) (1)  
Arrhythmic\_Syndromes\_Aug\_2015\_Fatkin (4)  
Clear

Exclude custom gene list  
e.g. BRCA1,PIK3CA,TP53  
Separate multiple genes with a semicolon, comma or space. To not include any genes, leave this box blank.

**Prevalence**  
Frequency in control databases  
 1000 Genomes  
 1%  
 ESP  
 1%  
 ExAC  
 1%  
Variants will be returned that are either below the allele frequency set or not present in the database. For no minimum allele frequency, set the value to 0%.

Exclude dbSNP Common  Exclude dbSNP Flagged

**Variant type(s)**  
 SNPs
  INDELS
  Both

Maximum number of variants to return

For research use only. Not for use in diagnostic procedures.  
© 2017 Garvan Institute. All rights reserved. [Contact Us](#)

Figure S3: Seave screenshot: filtration options/query page. The query page allows the user to specify filtration options to restrict the number of variants returned. Restrictions can be by genomic location, impact on genes, prevalence in control populations and sequencing quality.

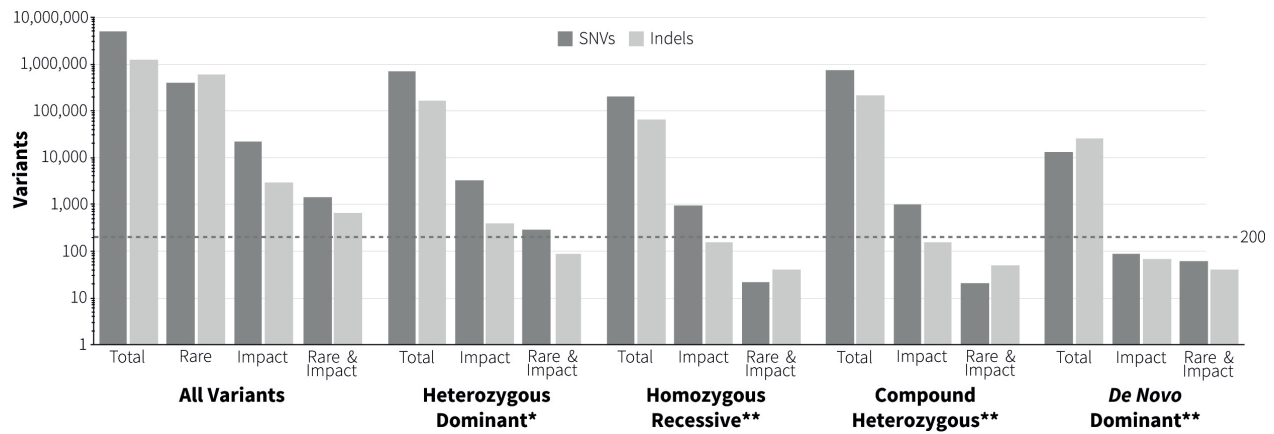

Figure S4: Variant counts from whole genome sequencing in the NA12878 trio restricted by combinations of rarity, gene impact (damaging) and inheritance patterns. Counts derived using the best practices GATK pipeline on raw data from the Illumina Platinum Genomes project (Eberle *et al.*, 2017), mapped to the b37+decoy reference genome, decomposed and normalised with vt (Tan *et al.*, 2015) and queried with GEMINI (Paila *et al.*, 2013). Rarity is defined as a maximum allele frequency of 1% in 1000 Genomes, ExAC and ESP. Impact is defined as medium or high impact, as defined by the Ensembl impact variant annotation. \*NA12878 and NA12891 were marked as affected for the purposes of this analysis. \*\*NA12878 was marked as affected for the purposes of this analysis.



Great. It's time for some **results**.

The table below displays your variants. *Click any row* to fetch all GEMINI information for that variant in a separate table.

Show: **10** entries

Search:

| Variant               | Quality       | Gene      | Type      | Impact                | KCCG Exomes AF | KCCG Genomes AF | ClinVar Variation ID | ClinVar Clinical Significance | ClinVar Trait              | Impact Summary |
|-----------------------|---------------|-----------|-----------|-----------------------|----------------|-----------------|----------------------|-------------------------------|----------------------------|----------------|
| chr14.g.50088557C>G   | 1037.13000488 | MGAT2     | SNP       | missense_variant      | 0              | 0               | 313257               | Uncertain significance        | Congenital disorder of     |                |
| chr9.g.2096706A>T     | 744.130004883 | SMARCA2   | SNP       | missense_variant      | 0              | 0               | 366215               | Likely benign                 | Nicotinoides-Baraitser syn |                |
| chr1.g.89660991C>G    | 548.130004883 | GBP4      | SNP       | missense_variant      | 0              | 0               | No Result            | No Result                     | No Result                  |                |
| chr1.g.23116181T>TAA  | 252.949996948 | FAM89A    | insertion | splice_region_variant | 0              | 0               | No Result            | No Result                     | No Result                  |                |
| chr3.g.183882362C>G   | 700.130004883 | DVL3      | SNP       | missense_variant      | 0              | 0               | No Result            | No Result                     | No Result                  |                |
| chr4.g.119259448C>T   | 444.130004883 | PRSS12    | SNP       | missense_variant      | 0              | 0               | No Result            | No Result                     | No Result                  |                |
| chr5.g.27028494CA>C   | 333.140014648 | CDH9      | Deletion  | splice_region_variant | 0              | 0.16 (25/160)   | No Result            | No Result                     | No Result                  |                |
| chr6.g.27115124GACA>G | 646.130004883 | HIST1H2AH | Deletion  | inframe_deletion      | 0              | 0               | No Result            | No Result                     | No Result                  |                |
| chr6.g.29835838C>CCA  | 3246.89990234 | HLA-K     | insertion | splice_region_variant | 0              | 0.15 (23/152)   | No Result            | No Result                     | No Result                  |                |
| chr6.g.128505804A>C   | 568.130004883 | PTPRK     | SNP       | missense_variant      | 0              | 0               | No Result            | No Result                     | No Result                  |                |

Showing 1 to 10 of 33 entries

Previous 1 2 3 4 Next

[Download query results \(.tsv format\)](#)  
Increase/decrease table width  
Show/hide GEMINI query

Figure S6: Seave screenshot: results table expanded with additional columns. The variants table on the results page can be expanded to show more annotation information. Any overflowing information can be read by hovering over the table cell and reading the tooltip that appears, as shown in this screenshot.

## References

- 1000 Genomes Project Consortium, Auton, A., Brooks, L. D., Durbin, R. M., Garrison, E. P., Kang, H. M., Korbel, J. O., Marchini, J. L., McCarthy, S., McVean, G. A., Abecasis, G. R., Gibbs, R. A., Wang, J., Li, Y., Gupta, N., Lander, E. S., Eichler, E. E., Alkan, C., Banks, E., Li, H., Barnes, B., Shaw, R., Kidd, J. M., Hormozdiari, F., Hurles, M. E., Abyzov, A., Gabriel, S. B., MacArthur, D. G., Gravel, S., Homer, N., Flicek, P., Montgomery, S. B., Altshuler, D. M., and Ruiz-Linares, A. (2015). A global reference for human genetic variation. *Nature Publishing Group*, **526**(7571), 68–74.
- 45 and Up Study Collaborators, Banks, E., Redman, S., Jorm, L., Armstrong, B., Bauman, A., Beard, J., Beral, V., Byles, J., Corbett, S., Cumming, R., Harris, M., Sitas, F., Smith, W., Taylor, L., Wutzke, S., and Lujic, S. (2008). Cohort profile: the 45 and up study. *International journal of epidemiology*, **37**(5), 941–947.
- Adzhubei, I. A., Schmidt, S., Peshkin, L., Ramensky, V. E., Gerasimova, A., Bork, P., Kondrashov, A. S., and Sunyaev, S. R. (2010). A method and server for predicting damaging missense mutations. *Nature Methods*, **7**(4), 248–249.
- Amberger, J. S., Bocchini, C. A., Schiettecatte, F., Scott, A. F., and Hamosh, A. (2015). OMIM.org: Online Mendelian Inheritance in Man (OMIM(R)), an online catalog of human genes and genetic disorders. *Nucleic Acids Research*, **43**(D1), D789–D798.
- Choi, Y., Sims, G. E., Murphy, S., Miller, J. R., and Chan, A. P. (2012). Predicting the functional effect of amino acid substitutions and indels. *PLoS ONE*, **7**(10), e46688.
- Davydov, E. V., Goode, D. L., Sirota, M., Cooper, G. M., Sidow, A., and Batzoglou, S. (2010). Identifying a high fraction of the human genome to be under selective constraint using GERP++. *PLoS Computational Biology*, **6**(12), e1001025.
- Dong, C., Wei, P., Jian, X., Gibbs, R., Boerwinkle, E., Wang, K., and Liu, X. (2015). Comparison and integration of deleteriousness prediction methods for nonsynonymous SNVs in whole exome sequencing studies. *Human molecular genetics*, **24**(8), 2125–2137.
- Eberle, M. A., Fritzilas, E., Krusche, P., Källberg, M., Moore, B. L., Bekritsky, M. A., Iqbal, Z., Chuang, H.-Y., Humphray, S. J., Halpern, A. L., Kruglyak, S., Margulies, E. H., McVean, G., and Bentley, D. R. (2017). A reference data set of 5.4 million phased human variants validated by genetic inheritance from sequencing a three-generation 17-member pedigree. *Genome Research*, **27**(1), 157–164.
- Forbes, S. A., Bindal, N., Bamford, S., Cole, C., Kok, C. Y., Beare, D., Jia, M., Shepherd, R., Leung, K., Menzies, A., Teague, J. W., Campbell, P. J., Stratton, M. R., and Futreal, P. A. (2010). COSMIC: mining complete cancer genomes in the Catalogue of Somatic Mutations in Cancer. *Nucleic Acids Research*, **39**(Database), D945–D950.
- Forbes, S. A., Beare, D., Gunasekaran, P., Leung, K., Bindal, N., Boutselakis, H., Ding, M., Bamford, S., Cole, C., Ward, S., Kok, C. Y., Jia, M., De, T., Teague, J. W., Stratton, M. R., McDermott, U., and Campbell, P. J. (2015). COSMIC: exploring the world’s knowledge of somatic mutations in human cancer. *Nucleic Acids Research*, **43**(Database issue), D805–11.
- Futreal, P. A., Coin, L., Marshall, M., Down, T., Hubbard, T., Wooster, R., Rahman, N., and Stratton, M. R. (2004). A census of human cancer genes. *Nature reviews. Cancer*, **4**(3), 177–183.
- Kircher, M., Witten, D. M., Jain, P., O’Roak, B. J., Cooper, G. M., and Shendure, J. (2014). A general framework for estimating the relative pathogenicity of human genetic variants. *Nature Publishing Group*, **46**(3), 310–315.
- Kumar, P., Henikoff, S., and Ng, P. C. (2009). Predicting the effects of coding non-synonymous variants on protein function using the SIFT algorithm. *Nature Protocols*, **4**(7), 1073–1081.
- Lacaze, P., Pinese, M., Kaplan, W., Stone, A., Brion, M.-J., Woods, R. L., McNamara, M., McNeil, J. J., Dinger, M. E., and Thomas, D. M. (2018). The Medical Genome Reference Bank: a whole-genome data resource of 4,000 healthy elderly individuals. Rationale and cohort design. *bioRxiv*, pages 1–15.



- Landrum, M. J., Lee, J. M., Riley, G. R., Jang, W., Rubinstein, W. S., Church, D. M., and Maglott, D. R. (2013). ClinVar: public archive of relationships among sequence variation and human phenotype. *Nucleic Acids Research*, **42**(D1), D980–D985.
- Lek, M., Karczewski, K. J., Minikel, E. V., Samocha, K. E., Banks, E., Fennell, T., O'Donnell-Luria, A. H., Ware, J. S., Hill, A. J., Cummings, B. B., Tukiainen, T., Birnbaum, D. P., Kosmicki, J. A., Duncan, L. E., Estrada, K., Zhao, F., Zou, J., Pierce-Hoffman, E., Berghout, J., Cooper, D. N., Deflaux, N., DePristo, M., Do, R., Flannick, J., Fromer, M., Gauthier, L., Goldstein, J., Gupta, N., Howrigan, D., Kiezun, A., Kurki, M. I., Moonshine, A. L., Natarajan, P., Orozco, L., Peloso, G. M., Poplin, R., Rivas, M. A., Ruano-Rubio, V., Rose, S. A., Ruderfer, D. M., Shakir, K., Stenson, P. D., Stevens, C., Thomas, B. P., Tiao, G., Tusie-Luna, M. T., Weisburd, B., Won, H.-H., Yu, D., Altshuler, D. M., Ardissino, D., Boehnke, M., Danesh, J., Donnelly, S., Elosua, R., Florez, J. C., Gabriel, S. B., Getz, G., Glatt, S. J., Hultman, C. M., Kathiresan, S., Laakso, M., McCarroll, S., McCarthy, M. I., McGovern, D., McPherson, R., Neale, B. M., Palotie, A., Purcell, S. M., Saleheen, D., Scharf, J. M., Sklar, P., Sullivan, P. F., Tuomilehto, J., Tsuang, M. T., Watkins, H. C., Wilson, J. G., Daly, M. J., MacArthur, D. G., and Exome Aggregation Consortium (2016). Analysis of protein-coding genetic variation in 60,706 humans. *Nature Publishing Group*, **536**(7616), 285–291.
- Liu, X., Jian, X., and Boerwinkle, E. (2013). dbNSFP v2.0: a database of human non-synonymous SNVs and their functional predictions and annotations. *Human Mutation*, **34**(9), E2393–402.
- McLaren, W., Gil, L., Hunt, S. E., Riat, H. S., Ritchie, G. R. S., Thormann, A., Flicek, P., and Cunningham, F. (2016). The Ensembl Variant Effect Predictor. *Genome Biology*, **17**(1), 122.
- McNeil, J. J., Woods, R. L., Nelson, M. R., Murray, A. M., Reid, C. M., Kirpach, B., Storey, E., Shah, R. C., Wolfe, R. S., Tonkin, A. M., Newman, A. B., Williamson, J. D., Lockery, J. E., Margolis, K. L., Ernst, M. E., Abhayaratna, W. P., Stocks, N., Fitzgerald, S. M., Trevaks, R. E., Orchard, S. G., Beilin, L. J., Donnan, G. A., Gibbs, P., Johnston, C. I., Grimm, R. H., and ASPREE Investigator Group (2017). Baseline Characteristics of Participants in the ASPREE (ASpirin in Reducing Events in the Elderly) Study. *The journals of gerontology. Series A, Biological sciences and medical sciences*, **72**(11), 1586–1593.
- Orphanet (2017). The portal for rare diseases and orphan drugs. <http://www.orpha.net>.
- Paila, U., Chapman, B. A., Kirchner, R., and Quinlan, A. R. (2013). GEMINI: Integrative Exploration of Genetic Variation and Genome Annotations. *PLoS Computational Biology*, **9**(7), e1003153–8.
- Petrovski, S., Wang, Q., Heinzen, E. L., Allen, A. S., and Goldstein, D. B. (2013). Genic Intolerance to Functional Variation and the Interpretation of Personal Genomes. *PLoS Genetics*, **9**(8), e1003709–13.
- Ruiz-Pesini, E., Lott, M. T., Procaccio, V., Poole, J. C., Brandon, M. C., Mishmar, D., Yi, C., Kreuziger, J., Baldi, P., and Wallace, D. C. (2007). An enhanced MITOMAP with a global mtDNA mutational phylogeny. *Nucleic Acids Research*, **35**(Database issue), D823–8.
- Shihab, H. A., Gough, J., Mort, M., Cooper, D. N., Day, I. N. M., and Gaunt, T. R. (2014). Ranking non-synonymous single nucleotide polymorphisms based on disease concepts. *Human Genomics*, **8**, 11.
- Tan, A., Abecasis, G. R., and Kang, H. M. (2015). Unified representation of genetic variants. *Bioinformatics*, **31**(13), 2202–2204.
- Tennessen, J. A., Bigham, A. W., O'Connor, T. D., Fu, W., Kenny, E. E., Gravel, S., McGee, S., Do, R., Liu, X., Jun, G., Kang, H. M., Jordan, D., Leal, S. M., Gabriel, S., Rieder, M. J., Abecasis, G., Altshuler, D., Nickerson, D. A., Boerwinkle, E., Sunyaev, S., Bustamante, C. D., Bamshad, M. J., Akey, J. M., Broad GO, Seattle GO, and NHLBI Exome Sequencing Project (2012). Evolution and functional impact of rare coding variation from deep sequencing of human exomes. *Science*, **337**(6090), 64–69.
